# Supplementary material for: Reducing the thermal conductivity of La2Mo2O9 with a trivalent praseodymium substitution for its potential use as a thermal barrier coating
Source: Royal Society of Chemistry journal article supplement (doi:10.1039/c9dt01192g), 2019-01-01
Supplement: c9dt01192g1.pdf [file c9dt01192g1.pdf]

Supporting Information

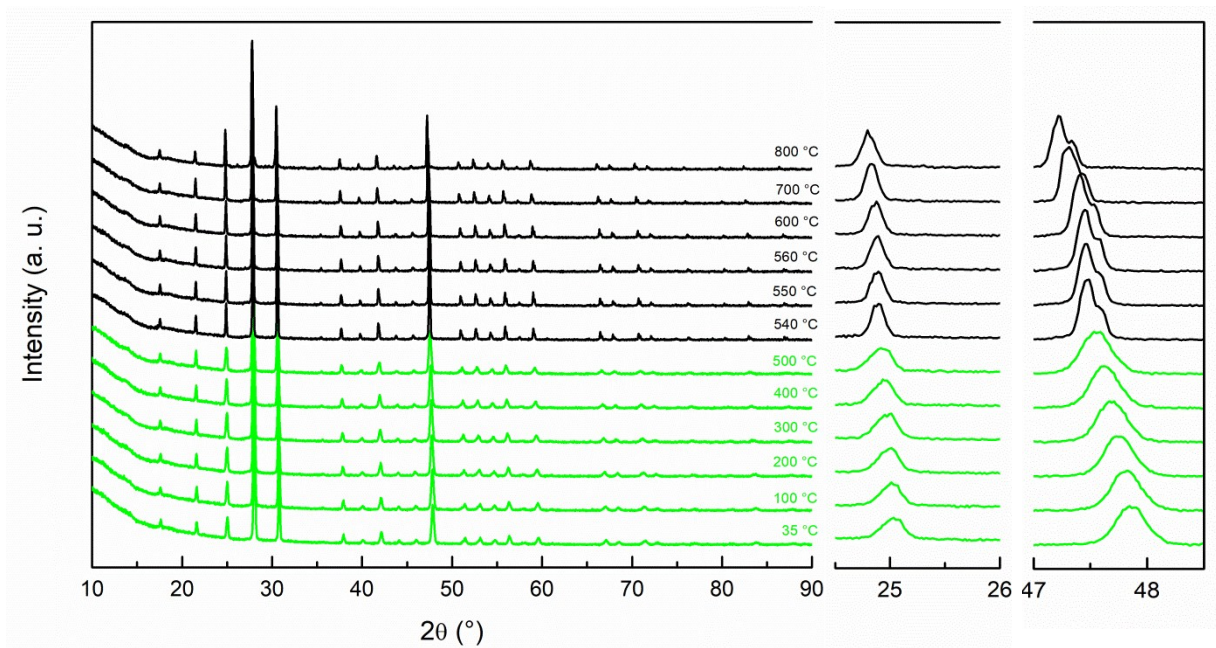

**Fig. S1** X-ray thermodiffraction patterns for  $(\text{La}_{0.25}\text{Pr}_{0.75})_2\text{Mo}_2\text{O}_9$  (powder sample). Insert: magnifications of the  $2\theta$  range 24.5 – 26 and 47 – 48.5 °.

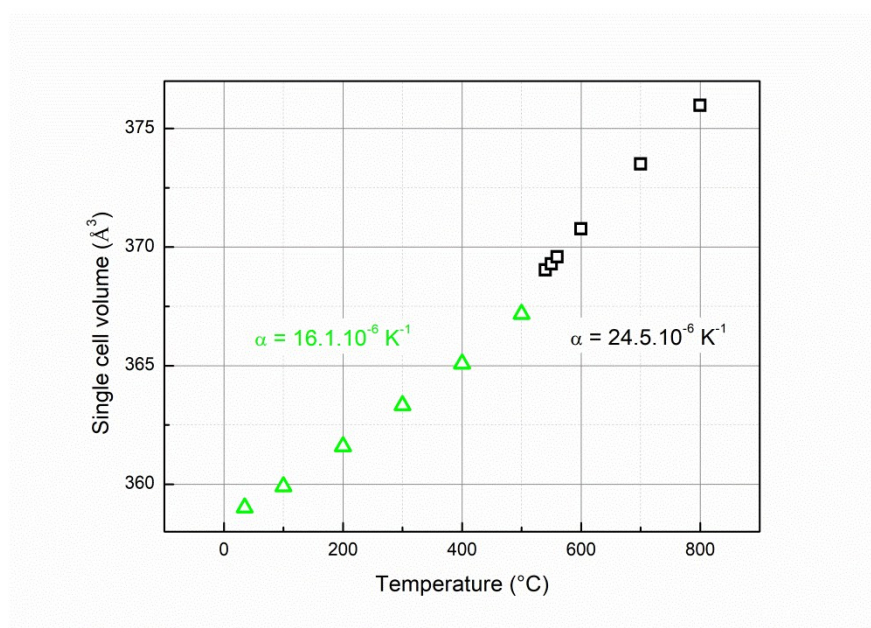

**Fig. S2** Cell volume refinements for  $(\text{La}_{1-x}\text{Pr}_x)_2\text{Mo}_2\text{O}_9$  with  $x = 0.75$  modeled from temperature resolved XRD patterns with a cubic cell (open square) and a triclinic cell (open triangle).
